# Supplementary material
Source: PubMed Central journal article supplement (PMC1183572)
Supplement: pnas_0504341102_3.pdf [file pnas_0504341102_3.pdf]

1 10 20 30 40 50  
ERCC1\_human MDPGKDKEGVPPQSPGPPARKKFVIPLDEDEVPVGVAKPLFRSTQSLPVTDSAQAA  
ERCC1\_mouse MDPGKDEESRPQPSGPPTRKRFVIPLDEEVPVAGVVKPLFRSSRNPTTPATSAHMA  
ERCC1\_arabi MANEDDDGGEKSRSLHQIARKPKQTQIVIGVPSYQEVLESSQTKSTPPSLFKPSQFSQAFAFVKSSDVYS  
ERCC1\_droso MEDFDDDSFNDVLGAMEM  
Swi10\_pombe  
Rad10\_cere MNNTDPTSFESILAGVAKLRKEKSGADTTGSQSLEID

XPF\_human  
Mus81\_A.p  
Hef\_P.fu  
RuvA\_E.c  
UvrC\_E.c

60 70 80 90 100 110  
ERCC1\_human PQTIAEYIAISQPLEGAGATCPTGSEPL...AGETPNQALKPGA...KNSNIIIVSPRGORGNPVLKFK  
ERCC1\_mouse PQTIAEYIAITQPPGGAGATVPTGSEPA...AGENPSQTLKTGA...KNSNIIIVSPRGORGNPVLKFK  
ERCC1\_arabi PPPSSAAAASSQPSGASQVPHSSSTQHTQDAGSSSTPVPATGSVSPNNTQNRNAIIIVSHRQKGNPLKHK  
ERCC1\_droso PTTAAKQPKVDAPAATAVNPAVNSSTEP...SGSRPAPKGPAS...NPHCVLVVHSKORGNPILKKS  
Swi10\_pombe MSDIDDEEFEQLAVSALAEVEKKGAFQAQPTQPKVSRV...TAHSHIIIVNPRQKGNPLLPH  
Rad10\_cere ASKLQOQEPQTSRRINSQVINAFNQQKPEEWTDSKATDDYNRKRKPRFRSTRPGKTVIVNTTQKENPLLNH

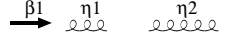

ERCC1\_human  
XPF\_human  
Mus81\_A.p  
Hef\_P.fu  
RuvA\_E.c  
UvrC\_E.c

120 130 140 150 160 170  
ERCC1\_human VRNVVPEEF.GDV...IPDYV...LGQSTCALFSLR...YHNLHPDYIYHGRLLQSLGKNFALRVLVLVQVVDV  
ERCC1\_mouse VRNVVPEEF.GEV...IPDYV...LGQSTCALFLSLR...YHNLHPDYIYHGRLLQSLGKNFALRVLVLVQVVDV  
ERCC1\_arabi IRNVKWFV.SDI...IPDYV...LGQNSCALVYSLR...YHLLHPDYLYFRIRLEQKNFKLSVVLVCHVDV  
ERCC1\_droso IILNVLEFRDDI...VPDYV...VGRTS CVLYLSLK...YHNLNPDYIYCRRLKALGKMYELRVLVLLVQVVDV  
Swi10\_pombe VRNVVPEY.TDI...VPDFV...MGTGICSVLFLSLK...YHLLHPEYIYSRISKLGKSYNLRILLLVLVDV  
Rad10\_cere LKSTNWRVSVST...GIMTYDYDLYVGRS...YHKLIVDYISRRMQLSRNEN.NILIFIVVDV

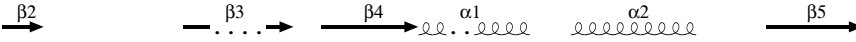

ERCC1\_human  
XPF\_human  
Mus81\_A.p  
Hef\_P.fu  
RuvA\_E.c  
UvrC\_E.c

180 190 200 210 220  
ERCC1\_human K...DPOQALKE[LAKM]CI.LADC[TL]L[L]AWSPEEAGRY[LE]TYKAYEQKPADLLMEKLEQ  
ERCC1\_mouse K...DPOQALKE[LAKM]CI.LADC[TL]L[L]AWSAEEAGRY[LE]TYRAYEQKPADLLMEKLEQ  
ERCC1\_arabi E...DTVKPLLEVTKTAL.LHDC[TL]LCAWMSMTECARY[LE]TIKYVENKPADLIQGGMDT  
ERCC1\_droso P...EPNNALKSLTRISL.LADL[TL]MMLAWNAEEAGK[I]ETYKQFEKRPDLIMERVES  
Swi10\_pombe E...NHQASIQELVKTSL.VNQY[TL]L[L]AWSSEEAAAY[LE]TYKAYENMSPALIMEKPSV  
Rad10\_cere N...NSEDTLNDITKL[CM.FNGE[TL]L[L]AFNFEOAAK[Y]EYLNL

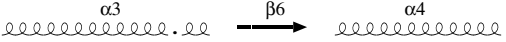

ERCC1\_human  
XPF\_human  
Mus81\_A.p  
Hef\_P.fu  
RuvA\_E.c  
UvrC\_E.c

230 240 250 260 270 280  
ERCC1\_human DFVSRVTE...CLTTVKSVMKTDSDQTLTTFGSLEQLIAASRED...LALCPGLGPQKARRLFD  
ERCC1\_mouse NFLSRATE...CLTTVKSVMKTDSDQTLTTFGSLEQLFTASRED...LALCPGLGPQKARRLFE  
ERCC1\_arabi DYLRLNH...SLTSIRHVNSKDDVVTLGSTFGSLAHIDASMED...LARCPGIGERKKVRLYD  
ERCC1\_droso NPHQKLLA...ALTNIKPVNKTDAALLLHTFNGNLGNINASEER...LSQVMGLGPRKAKKLYK  
Swi10\_pombe DYLSQVQS...FLTSIRGINKSDLSLSLKFGLSERALVARSDE...LEQLEGWGPQTKVNRFLP  
Rad10\_cere

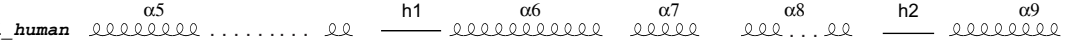

ERCC1\_human  
XPF\_human  
Mus81\_A.p  
Hef\_P.fu  
RuvA\_E.c  
UvrC\_E.c

290  
ERCC1\_human VLHEPFLKVP  
ERCC1\_mouse VLHEPFLKVP  
ERCC1\_arabi TFHEPFRKRTSSYPVVEPPIPPEAPVEKDVNSEPEVEDEDFVEDSRKRRKKPEPEPEKTVKTALSAVFAR  
ERCC1\_droso TLQEPFLSK  
Swi10\_pombe AVQQPFFMSHSTIKRPEAINLKQT  
Rad10\_cere

ERCC1\_human 000

890 900  
XPF\_human FIHTSFAEVVSKGKGGK  
Mus81\_A.p ILMTPYKRS  
Hef\_P.fu VITAPYIEDEE  
RuvA\_E.c EMKDRFKGLHGDLF  
UvrC\_E.c SLKH
