# Supplementary material
Source: PubMed Central journal article supplement (PMC1183572)
Supplement: pnas_0504341102_6.pdf [file pnas_0504341102_6.pdf]

**Table 1.** Binding of the central domain of ERCC1 to different DNA substrates at 20 mM NaCl

DNA oligomers (annealed as described below)

- 1 5'-6FAM-CCGGTGGCCAGCGCTCGGCGT<sub>20</sub>
- 2 5'-A<sub>20</sub>CGCCGAGCGCTGGCCACCGG
- 3 5'-A<sub>20</sub>CGCCG
- 4 5'-AAAAACGCCGAGCGCTGGCCACCGG
- 5 5'-A<sub>20</sub>CGCCGAG
- 6 5'-A<sub>20</sub>CGCCGAGCG
- 7 5'-A<sub>20</sub>CGCCGAGCGCT
- 8 5'-6FAM -GTCGGACTGATTCGG
- 9 5-GGCCTGCCACCGCTCCGAATCAGTCCGAC

| # | Annealed oligomers | DNA substrate                                                                               | K <sub>D</sub> , μM |
|---|--------------------|---------------------------------------------------------------------------------------------|---------------------|
| 1 | <b>1 + 2</b>       | 6FAM-5' 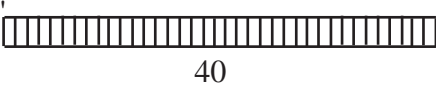   | 47 ± 4              |
| 2 | <b>1</b>           | 6FAM-5'    | 1.8 ± 0.2           |
| 3 | <b>1 + 3</b>       | 6FAM-5'  | 3.7 ± 0.4           |
| 4 | <b>1 + 5</b>       | 6FAM-5'  | 4.2 ± 1.1           |
| 5 | <b>1 + 6</b>       | 6FAM-5'  | 6.9 ± 0.9           |
| 6 | <b>1 + 7</b>       | 6FAM-5'  | 7.0 ± 1.7           |
| 7 | <b>8 + 9</b>       | 5'       | 2.0 ± 0.1           |
| 8 | <b>1 + 4</b>       | 6FAM-5'  | 16 ± 4              |
