# Supplementary material
Source: PubMed Central journal article supplement (PMC1183572)

**A**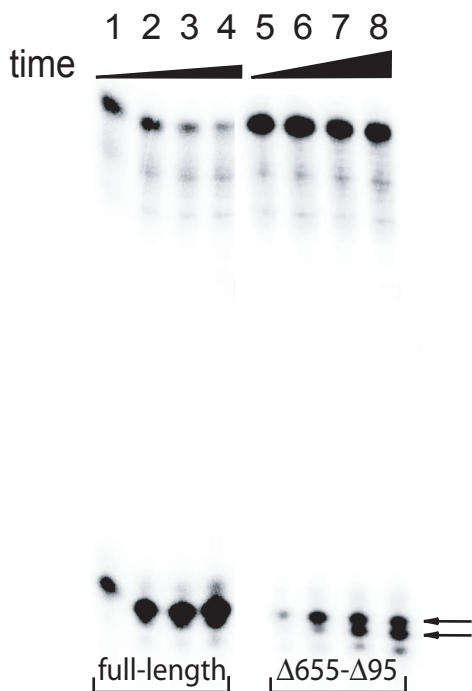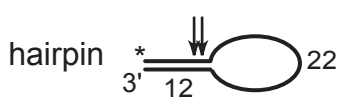**B**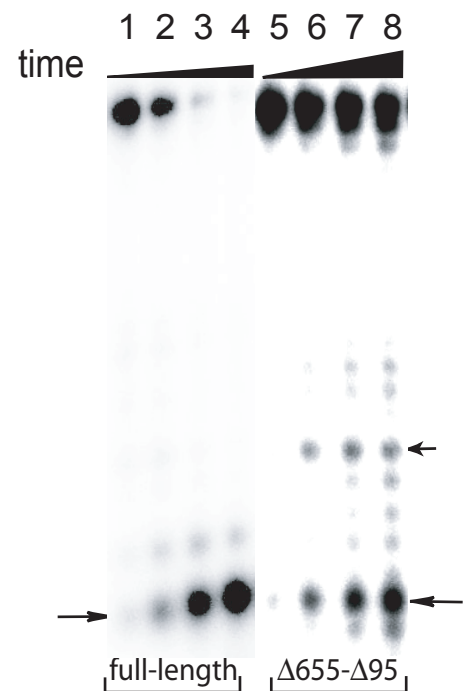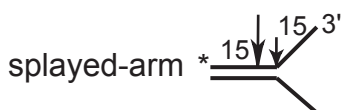**C**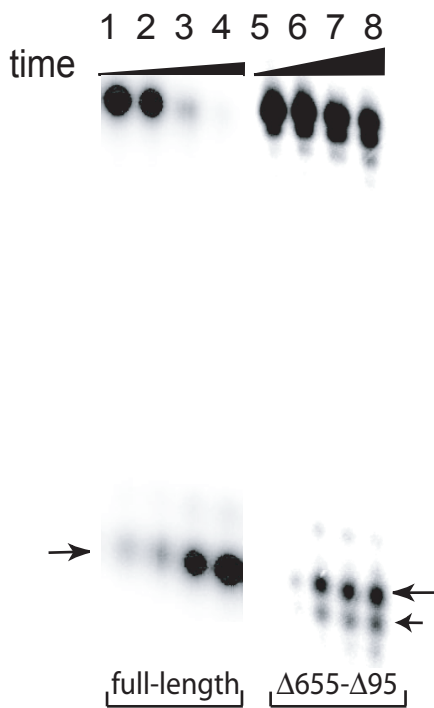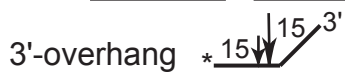**D**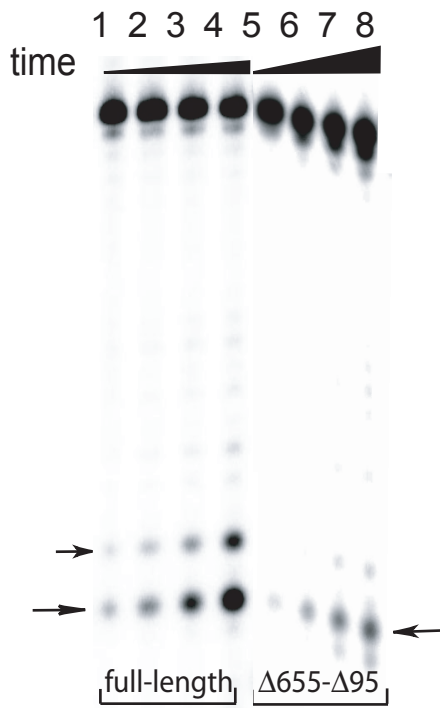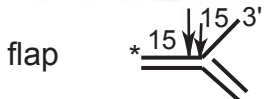

Supplement: pnas_0504341102_1.pdf [file pnas_0504341102_1.pdf]

## Ni-chelating column

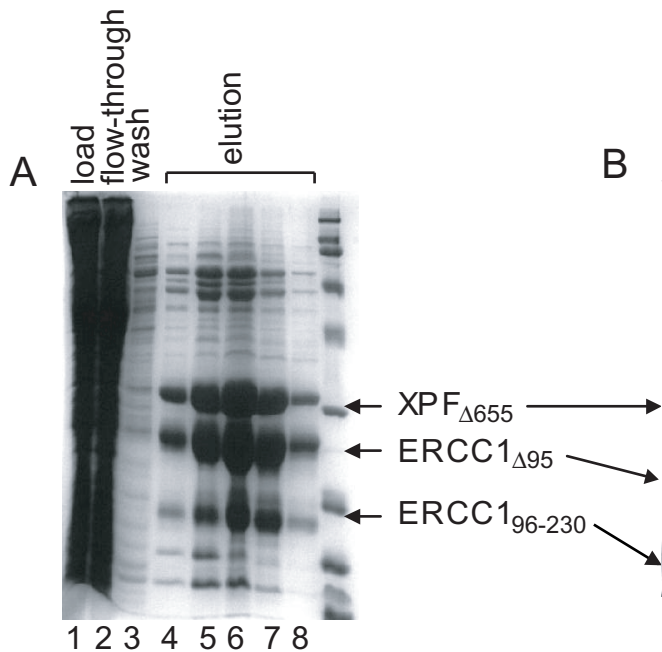

## Gel filtration column

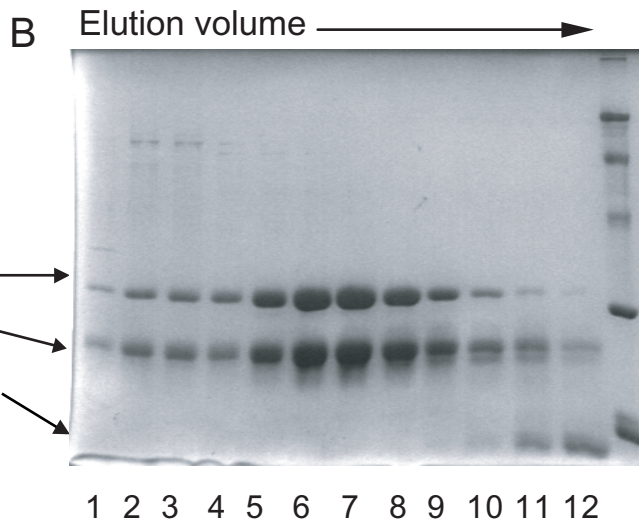

Supplement: pnas_0504341102_2.pdf [file pnas_0504341102_2.pdf]

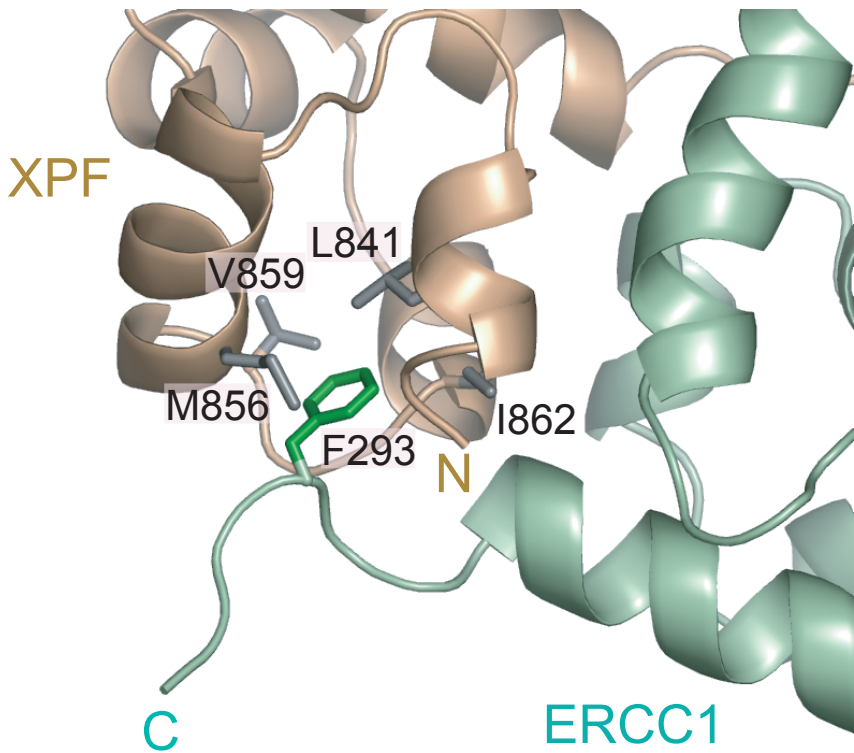

Supplement: pnas_0504341102_4.pdf [file pnas_0504341102_4.pdf]

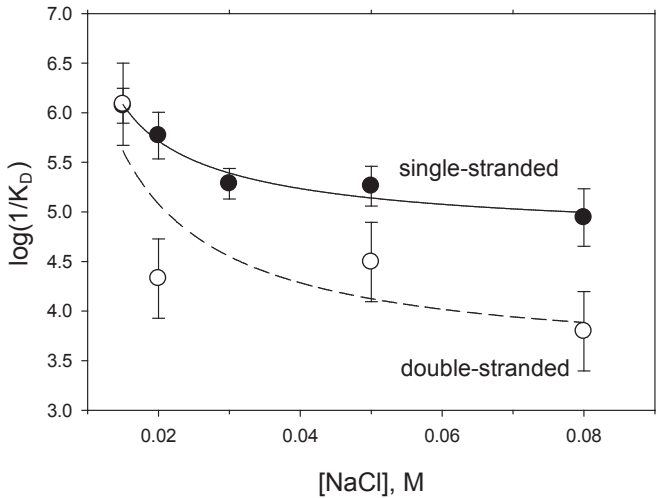

Supplement: pnas_0504341102_5.pdf [file pnas_0504341102_5.pdf]
